# Supplementary material for: A specific low-density neutrophil population correlates with hypercoagulation and disease severity in hospitalized COVID-19 patients
Source: PubMed Central journal article supplement (PMC8262329; doi:10.1172/jci.insight.148435), 2021-05-10

## **Inventory for Supplemental materials**

1. Supplemental Tables 1-6
2. 7 Supplemental Figures

| Variables                                             | Healthy Control (N=6) | Comorbid Healthy Control (N=9) | COVID-19 (N=53) |
|-------------------------------------------------------|-----------------------|--------------------------------|-----------------|
| <b>Sex – no (%)</b>                                   |                       |                                |                 |
| Male                                                  | 4 (66.6)              | 5 (55.5)                       | 24 (42.3)       |
| Female                                                | 2 (33.3)              | 4 (44.4)                       | 28 (57.7)       |
| <b>Age - year</b>                                     |                       |                                |                 |
| Mean ± SD                                             | 49.2 (15.1)           | 65.9 (16.7)                    | 60.8 (17.75)    |
| Median (IQR)                                          | 53.5 (24.25)          | 63 (24)                        | 63 (28.25)      |
| Range                                                 | 28-68                 | 41-93                          | 28-95           |
| <b>BMI</b>                                            |                       |                                |                 |
| Mean ± SD                                             | 28.75 (3.5)           | 30.82 (13.1)                   | 31.83 (9.07)    |
| Median (IQR)                                          | 29.55 (3.13)          | 29.15 (11.22)                  | 30.6 (14.48)    |
| Range                                                 | 16.3-27               | 16.4 - 60.2                    | 17.7- 51.8      |
| <b>Ethnicity – no (%)</b>                             |                       |                                |                 |
| AA                                                    | 0 (0)                 | 2 (22)                         | 18 (34.6)       |
| White                                                 | 6 (100)               | 7 (78)                         | 33 (63.4)       |
| Hispanic                                              | 0 (0)                 | 0 (0)                          | 1 (2)           |
| <b>Time from symptoms to hospital admission, days</b> |                       |                                |                 |
| Mean ± SD                                             |                       |                                | 5.17 (5.41)     |
| Median (IQR)                                          |                       |                                | 4 (4.75)        |
| Range                                                 |                       |                                | 0-14            |
| <b>Comorbidity – no (%)</b>                           |                       |                                |                 |
| Mean ± SD                                             | 1 (.81)               | 6 (2.62)                       | 6.1 (3.7)       |
| Median (IQR)                                          | 1 (1.5)               | 7 (4)                          | 4               |
| Range                                                 | 0-2                   | 1-9                            | 1-18            |
| hypertension                                          | 2 (33.3)              | 7 (77.7)                       | 39 (75)         |
| Diabetes                                              | 0                     | 4 (44.4)                       | 27 (52)         |
| Respiratory System                                    | 0                     | 6 (66.6)                       | 21 (40.4)       |
| Cardiovascular Disease                                | 0                     | 4 (44.4)                       | 22 (42.3)       |
| Kidney Disease                                        | 0                     | 1 (11.1)                       | 11 (21.15)      |
| <b>Treatment</b>                                      |                       |                                |                 |
| Hydroxychloroquine – no (%)                           |                       |                                | 8 (15.38)       |
| Convalescent Plasma – no (%)                          |                       |                                | 8 (15.38)       |
| Dexamethasone – no (%)                                |                       |                                | 12 (23.1)       |
| Remdesivir – no%                                      |                       |                                | 11 (21.15)      |

**Table S1: Total study participant demographics and clinical information**

| Neutrophil phenotyping      | Healthy Control (N=6) | Comorbid Healthy Control (N=9) | COVID-19 Moderate (N=24) | COVID-19 Severe (N=12) |
|-----------------------------|-----------------------|--------------------------------|--------------------------|------------------------|
| <b>Sex – no (%)</b>         |                       |                                |                          |                        |
| Male                        | 4 (66.6%)             | 5 (55.5%)                      | 13 (54%)                 | 6 (50%)                |
| Female                      | 2 (33.3%)             | 4 (44.4%)                      | 11 (46%)                 | 6 (50%)                |
| <b>Age – year</b>           |                       |                                |                          |                        |
| Mean ± SD                   | 49.2 (15.1)           | 65.9 (16.7)                    | 63.1 (18.55)             | 63.6 (15.1)            |
| Range                       | 28-68                 | 41-93                          | 28-95                    | 28-84                  |
| <b>BMI</b>                  |                       |                                |                          |                        |
| Mean ± SD                   | 28.75 (3.5)           | 30.82 (13.1)                   | 31.15 (7.67)             | 36.4 (9.86)            |
| Range                       | 16.3-27               | 16.4 - 60.2                    | 17.7- 48.8               | 21.2- 49.8             |
| <b>Ethnicity – no (%)</b>   |                       |                                |                          |                        |
| AA                          | 0 (0)                 | 2 (22)                         | 9 (37.5)                 | 7 (58.3)               |
| White                       | 6 (100)               | 7 (78)                         | 15 (62.5)                | 5 (41.6)               |
| <b>Comorbidity – no (%)</b> |                       |                                |                          |                        |
| Mean ± SD                   | 1 (.81)               | 6 (2.62)                       | 4.58 (3.21)              | 4.7 (3.17)             |
| Range                       | 0-2                   | 1-9                            | 1-12                     | 1-12                   |

**Table S2: Neutrophil phenotyping study participant demographics and clinical information**

| Platelet study             | COVID-19 Patients |
|----------------------------|-------------------|
| <b>Sex – (Total, n=13)</b> |                   |
| Male                       | 7 (53.8%)         |
| Female                     | 6 (46.2%)         |
| <b>Age - year</b>          |                   |
| Mean ± SD                  | 52.15 ± (20.21)   |
| Range                      | 21- 84            |
| <b>BMI</b>                 |                   |
| Mean ± SD                  | 32.4 ± (8.8)      |
| Range                      | 21.1 – 45.9       |
| <b>Ethnicity</b>           |                   |
| White                      | 11(84.6%)         |
| African American           | 2 (15.4%)         |
| <b>Comorbidities</b>       |                   |
| Mean ± SD                  | 6.23 ± (4.16)     |
| Range                      | 1-18              |

**Table S3. Platelet study participant demographics and clinical information**

| <b>BAL study</b>          | <b>COVID-19 Patients</b> |
|---------------------------|--------------------------|
| <b>Sex – (Total, n=6)</b> |                          |
| Male                      | 2 (33%)                  |
| Female                    | 4 (66%)                  |
| <b>Age - year</b>         |                          |
| Mean ± SD                 | 63.67 ± (14.06)          |
| Range                     | 40-83                    |
| <b>BMI</b>                |                          |
| Mean ± SD                 | 35.36 ± (8.65)           |
| Range                     | 22.2 - 45.8              |
| <b>Ethnicity</b>          |                          |
| White                     | 4(66%)                   |
| African American          | 2 (33%)                  |
| <b>Comorbidities</b>      |                          |
| Mean ± SD                 | 5 ± (3)                  |
| Range                     | 0-9                      |

**Table S4. BAL fluid study participant demographics and clinical information**

| <b>Plasma</b>              | <b>COVID-19 Patients</b> |
|----------------------------|--------------------------|
| <b>Sex – (Total, n=36)</b> |                          |
| Male                       | 14 (39%)                 |
| Female                     | 22 (61%)                 |
| <b>Age - year</b>          |                          |
| Mean ± SD                  | 63.3 ± (17.09)           |
| Range                      | 28-95                    |
| <b>BMI</b>                 |                          |
| Mean ± SD                  | 31.51 ± (8.9)            |
| Range                      | 17.7 – 49.8              |
| <b>Ethnicity</b>           |                          |
| White                      | 21(58.3%)                |
| African American           | 14 (38.9%)               |
| Hispanic                   | 1 (2.7%)                 |
| <b>Comorbidities</b>       |                          |
| Mean ± SD                  | 5.5 ± (6.04)             |
| Range                      | 1-18                     |

**Table S5. Plasma cytokine/chemokine study participant demographics and clinical information**

**Table S6. Mass cytometry antibody panel**

| <b>Antigen</b>     | <b>Symbol and Mass</b> | <b>Antibody clone</b> | <b>Source</b>     |
|--------------------|------------------------|-----------------------|-------------------|
| CD45               | 89Y                    | HI30                  | Fluidigm          |
| CD8                | 106Cd                  | RPA-T8                | Biolegend-Custom  |
| CD14               | 110Cd                  | M5E2                  | Biolegend- Custom |
| CD4                | 111Cd                  | RPA-T4                | Biolegend-Custom  |
| CD11b              | 112Cd                  | IRCF44                | Biolegend-Custom  |
| CD3                | 113Cd                  | UCHT1                 | Biolegend-Custom  |
| CD20               | 114Cd                  | 2H7                   | Biolegend-Custom  |
| CD19               | 116Cd                  | HIB19                 | Biolegend-Custom  |
| CD196              | 141Pr                  | G034E4                | Fluidigm          |
| CD40               | 142Nd                  | 5C3                   | Fluidigm          |
| CD123              | 143Nd                  | 6H6                   | Fluidigm          |
| CD69               | 144Nd                  | FN50                  | Fluidigm          |
| CD163              | 145Nd                  | GHI/61                | Fluidigm          |
| IgD                | 146Nd                  | IA6-2                 | Fluidigm          |
| CD11c              | 147Sm                  | Bu15                  | Fluidigm          |
| CD66b              | 148Nd                  | G10F5                 | Biolegend-Custom  |
| CD45RO             | 149Sm                  | UCHL1                 | Fluidigm          |
| LAG-3              | 150Nd                  | 11C3C65               | Fluidigm          |
| LAMP1              | 151Eu                  | H4A3                  | Fluidigm          |
| CD21               | 152Sm                  | BL13                  | Fluidigm          |
| $\gamma\delta$ TCR | 153Eu                  | B1                    | Biolegend-Custom  |
| TIM-3              | 154Sm                  | F38-2E2               | Fluidigm          |
| CD56               | 155Gd                  | HCD56                 | Fluidigm          |
| CD86               | 156Gd                  | IT2.2                 | Fluidigm          |
| TLR4               | 158Gd                  | HTA125                | Fluidigm          |
| CD197              | 159Tb                  | G043H7                | Fluidigm          |
| CD28               | 160Gd                  | CD28.2                | Fluidigm          |
| CD80               | 161Dy                  | 2D10.4                | Fluidigm          |
| CD79b              | 162Dy                  | CB3-1                 | Fluidigm          |
| CXCR3              | 163Dy                  | G025H7                | Fluidigm          |
| CXCR5              | 164Dy                  | RF8B2                 | Fluidigm          |
| CD45RA             | 165Ho                  | HI100                 | Biolegend-Custom  |
| CD44               | 166Er                  | BJ18                  | Fluidigm          |
| CD27               | 167Er                  | L128                  | Fluidigm          |
| CD40L              | 168Er                  | 24-31                 | Fluidigm          |
| CD25               | 169Tm                  | 2A3                   | Fluidigm          |
| CTLA-4             | 170Er                  | 14D3                  | Fluidigm          |
| CD68               | 171Yb                  | Y1/82A                | Fluidigm          |

|        |       |          |          |
|--------|-------|----------|----------|
| CD38   | 172Yb | HIT2     | Fluidigm |
| HLA-Dr | 173Yb | L243     | Fluidigm |
| CD279  | 174Yb | EH12.2H7 | Fluidigm |
| CD274  | 175Lu | 29E.2A3  | Fluidigm |
| CD127  | 176Yb | A019D5   | Fluidigm |
| CD16   | 209Bi | 3G8      | Fluidigm |

---

## Supplemental Figure legends:

**Figure S1. COVID-19 patients have increased neutrophils and neutrophil to lymphocyte ratio (NLR).** (A) Neutrophil and lymphocyte percentages and the NLR in whole blood as measured by a clinical complete blood count (CBC) in healthy donors (HD), comorbidity control patients (Cm Ctrl), and patients with moderate and severe COVID-19. Data points represent a single time point collected from 6 HDs, 9 Cm Ctrl, and the average values of serial blood samples collected during patient hospitalization from 24 moderate patients and 12 severe patients starting from the day of enrollment. Pie charts depict representative data of the NLR in HDs, severe and moderate patients. (B) Representative viSNE plots generated using CytoBank showing decreased CD3 (left), CD4 (middle), and CD8 (right) expression in Cm Ctrl patients, moderate and severe COVID-19 patients as compared to HDs in the CD45<sup>+</sup> compartment of PBMCs. Data are presented as mean±SD. p values were determined using a one-way ANOVA with multiple comparisons. \*p< 0.05, \*\*p<0.01, \*\*\*p < 0.001.

**Figure S2. Cluster analysis of neutrophils within the CD45<sup>+</sup> PBMCs in HD, Cm Ctrl, and moderate and severe COVID-19 patients.** Heatmap of differential expression pattern of lineage and surface markers of neutrophils in PBMCs. The color key identifies the cluster populations.

**Figure S3. Differential expression of neutrophil clusters in patients over their clinical course of disease.** (A) viSNE plots representing the total CD66b<sup>+</sup> neutrophil pool in 4 patients who experienced different clinical courses from days 1, 3 and 5 of study enrollment. Data represent a patient who was classified as severe on days 1, 3 and 5 (top), a patient whose

condition improved, and was transitioned to a moderate patient by day 5 (2<sup>nd</sup> from top), a patient who remained in the moderate group for the entirety of the study (2<sup>nd</sup> from bottom), and one patient who progressed from the moderate to severe group (bottom). The dynamic nature of CD66b<sup>+</sup> neutrophil populations over the course of disease are highlighted by the black and red circles, where cluster surface marker phenotypes are indicated in S4b. **(B)** Heatmap showing differential surface marker expression on the CD66b<sup>+</sup> neutrophil pool, which indicates specific subsets of neutrophil populations within the neutrophil compartment.

**Figure S4. Differentially expressed genes and enriched pathways between CD16<sup>High</sup> and CD16<sup>Int</sup> LDN from severe COVID-19 patients. (A)** Principal component analysis (PCA) by the first two principal components (PC1: 68%; PC2: 18%). CD16<sup>High</sup> and CD16<sup>Int</sup> LDN were sorted from three severe COVID-19 patients. Normal density neutrophils (NDN) were obtained from three HDs. The three sample groups segregate from each other with a high aggregation between replicates. **(B)** Heatmaps show differentially expressed genes for GO: neutrophil activation (left) and GO: neutrophil involved immune response (right) between CD16<sup>High</sup> and CD16<sup>Int</sup> LDN. **(C)** GSEA analysis shows significant enriched pathways in CD16<sup>Int</sup> LDN compared to CD16<sup>High</sup> LDN.

**Figure S5. Correlation of plasma levels of cytokine/chemokine with the frequency of CD16<sup>Int</sup> LDN in the PBMC population. (A)** CXCR3 and CD44 expression levels on CD16<sup>Int</sup> and CD16<sup>High</sup> neutrophils in BAL fluid samples. Data are shown as mean±SD. p values were determined using a Student's t-test \*p<.05, \*\*p<0.01. **(B)** Plasma IL-10, IL-1RA, MCP-1 and MIP-1 $\alpha$  levels in serial patient draws were correlated with both the percent of CD16<sup>High</sup> and CD16<sup>Int</sup> neutrophils in the corresponding sample as measured by CyTOF. Pearson correlations



were used to indicate statistical significance in all correlations, where ns=  $p \geq 0.05$ , \*  $p < 0.05$ , \*\* $p < 0.01$ , \*\*\* $p < 0.001$ .

**Figure S6. Correlation of TNF- $\alpha$  and IL-6 with clinical markers** (A) TNF- $\alpha$  plasma concentrations were correlated with the clinically measured values from the same day that the sample was acquired. Samples that fell below the level of detection of the TNF- $\alpha$  ELISA were excluded from correlation data. (B) IL-6 plasma concentrations were correlated with the clinically measured D-dimer, ferritin, platelets, and LDH levels from the same day that the sample was acquired. Samples that fell below the level of detection of the IL-6 ELISA were excluded from correlation data. For all correlation data, a line of best fit is shown to visually examine correlation, with a green line representing a statistically significant correlation, a red line representing a non-significant correlation. Pearson correlations were used to determine significance. \* $p < 0.05$ , \*\* $p < 0.01$ , \*\*\* $p < 0.001$ .

**Figure S7. Association of circulating CD16<sup>Int</sup> neutrophil population with clinical D-dimer levels.** Sequential whole blood analysis of the CD16<sup>Int</sup> neutrophil population (middle circle) for severe (A) and moderate (B) COVID-19 patients overlaid with clinical D-dimer quants from the corresponding days.

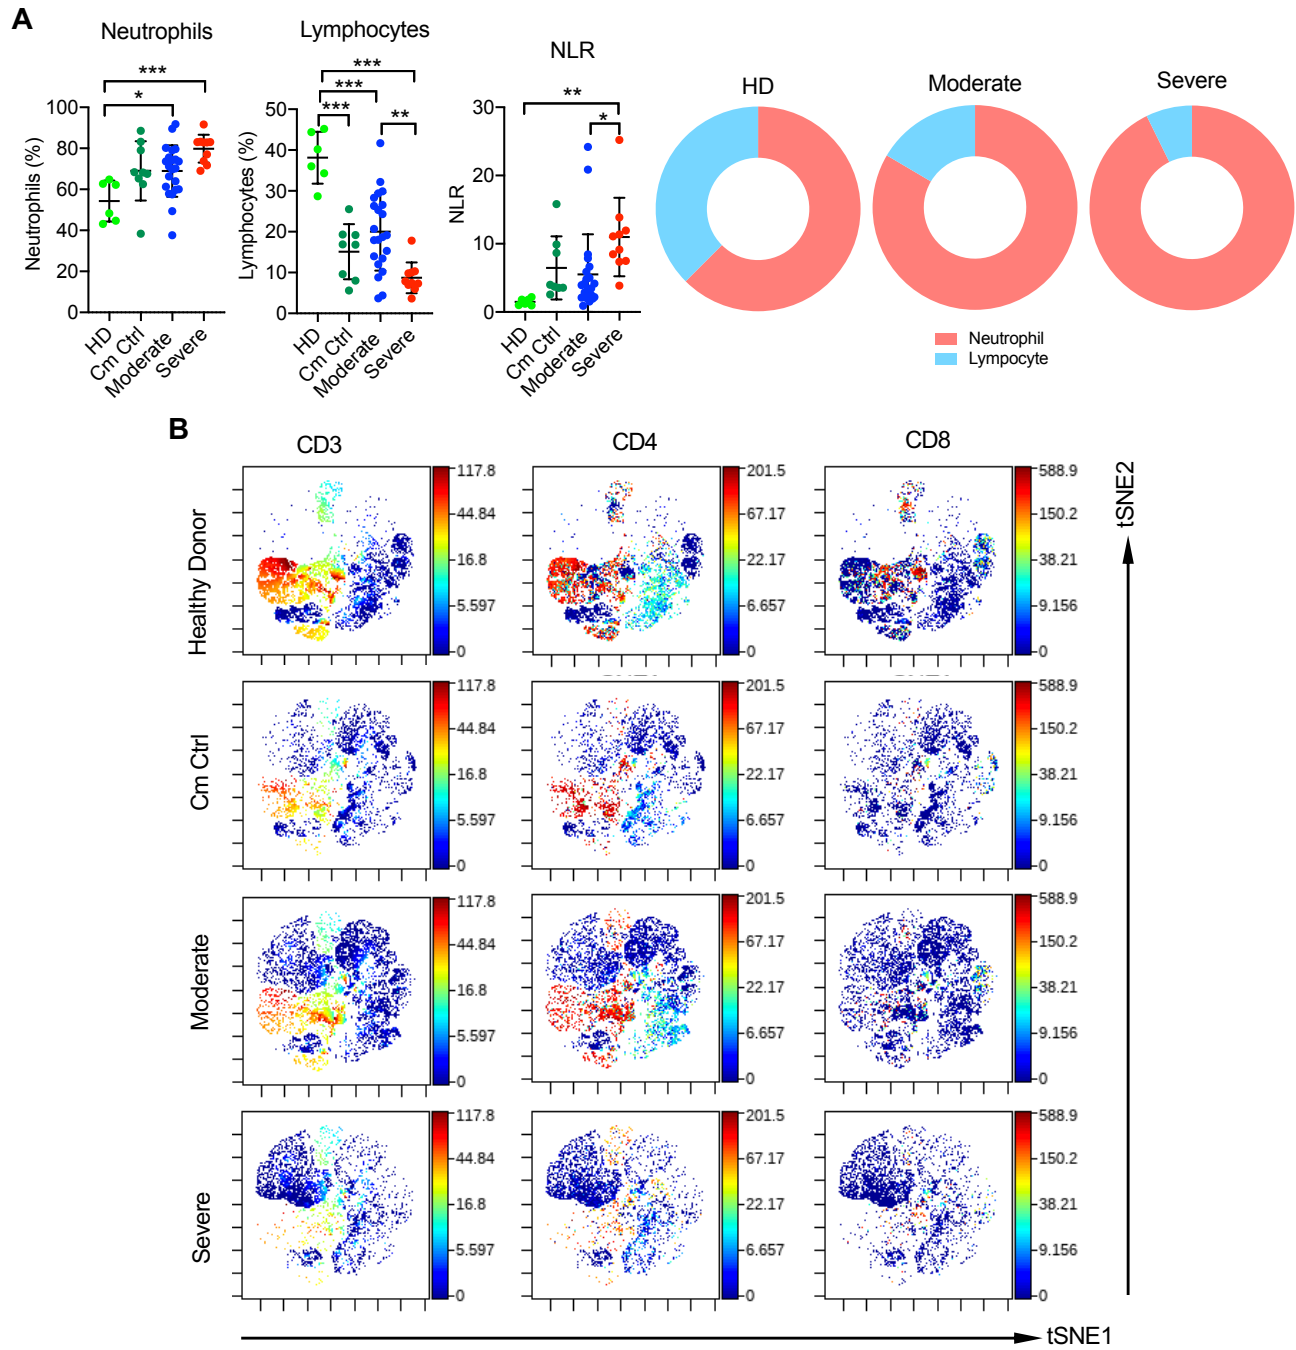

Morrissey et al, Supplemental Figure 2

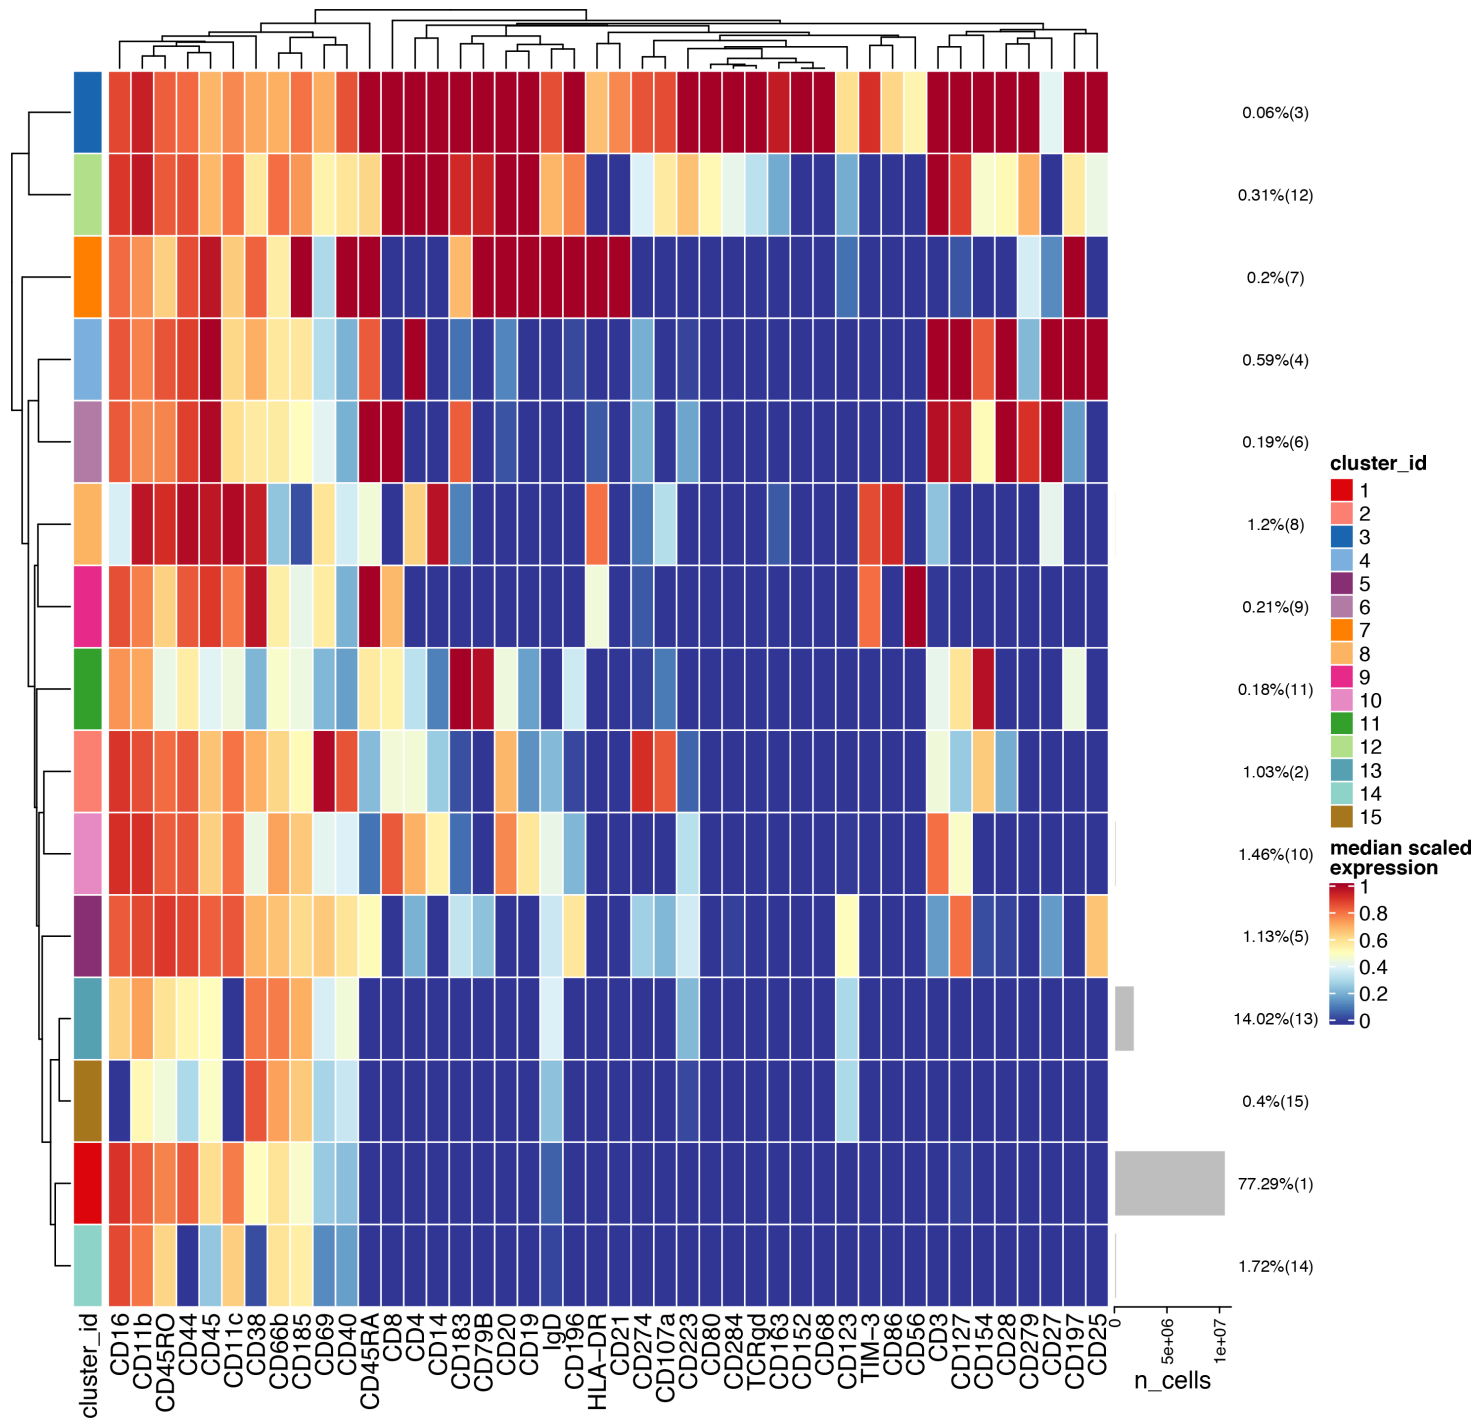

Morrissey et al, Supplemental Figure 3

**A**

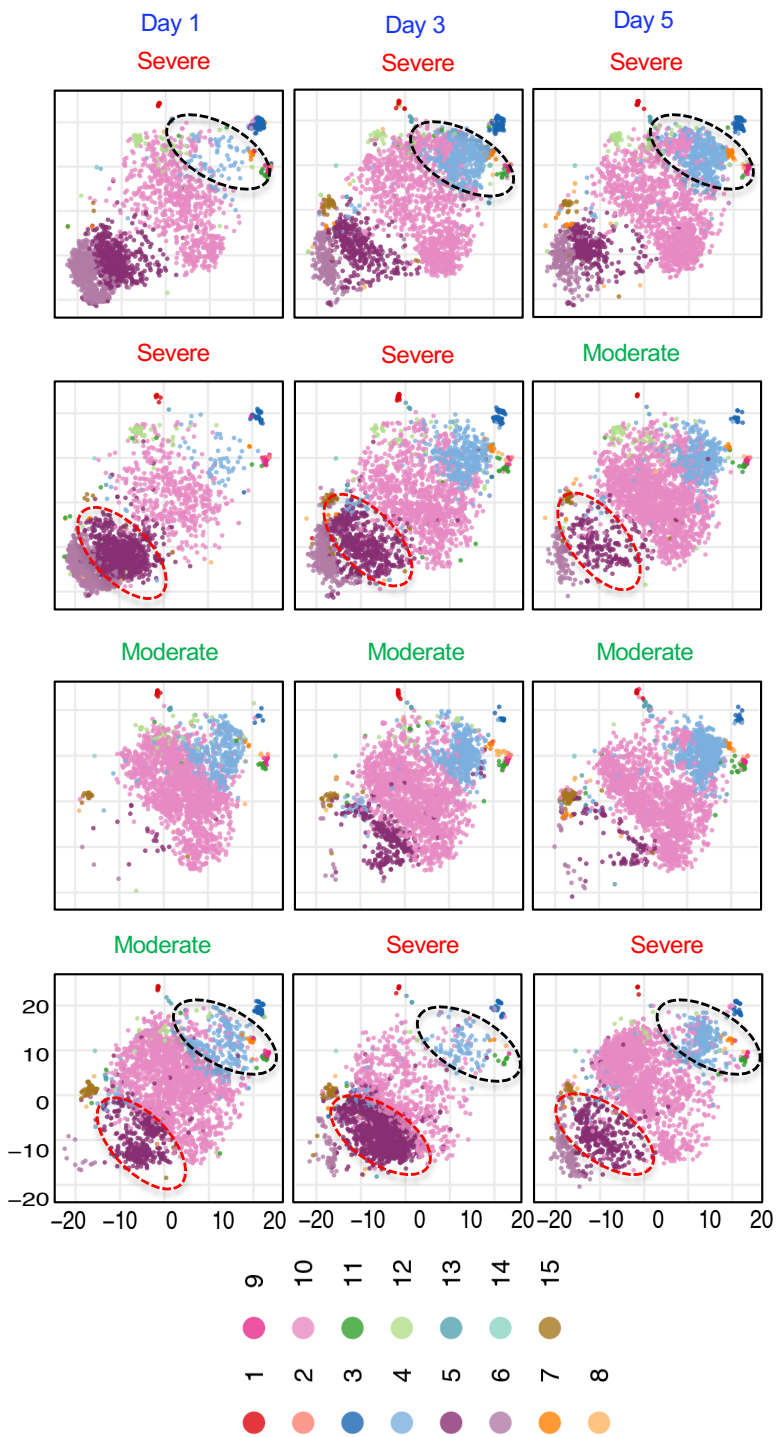

**B**

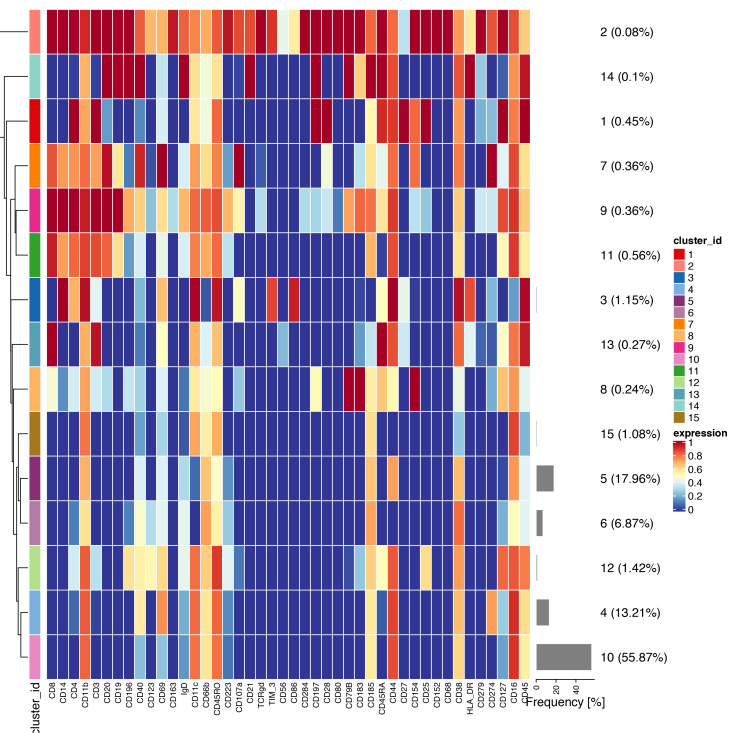

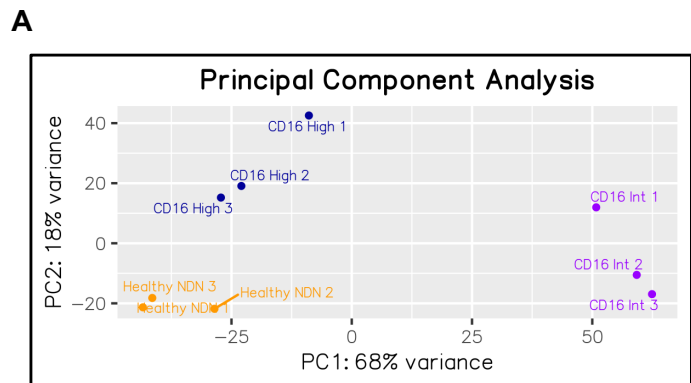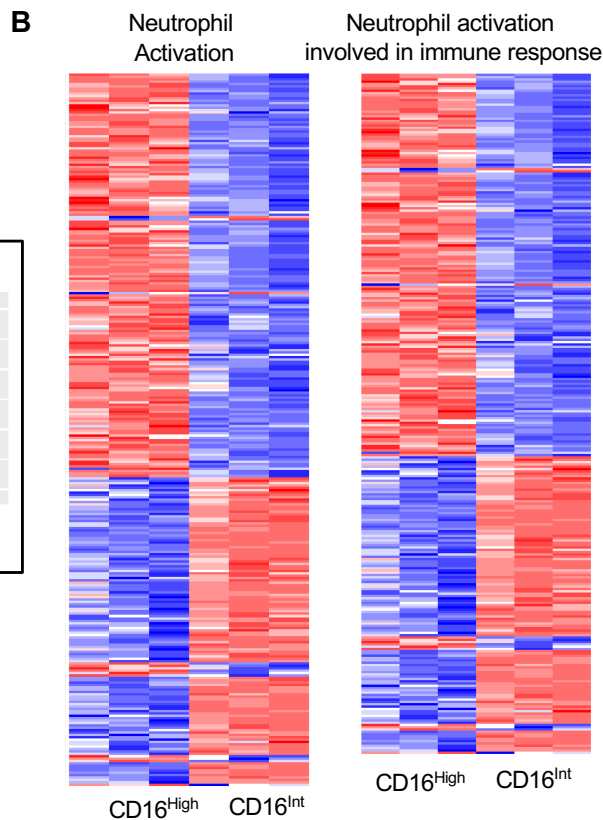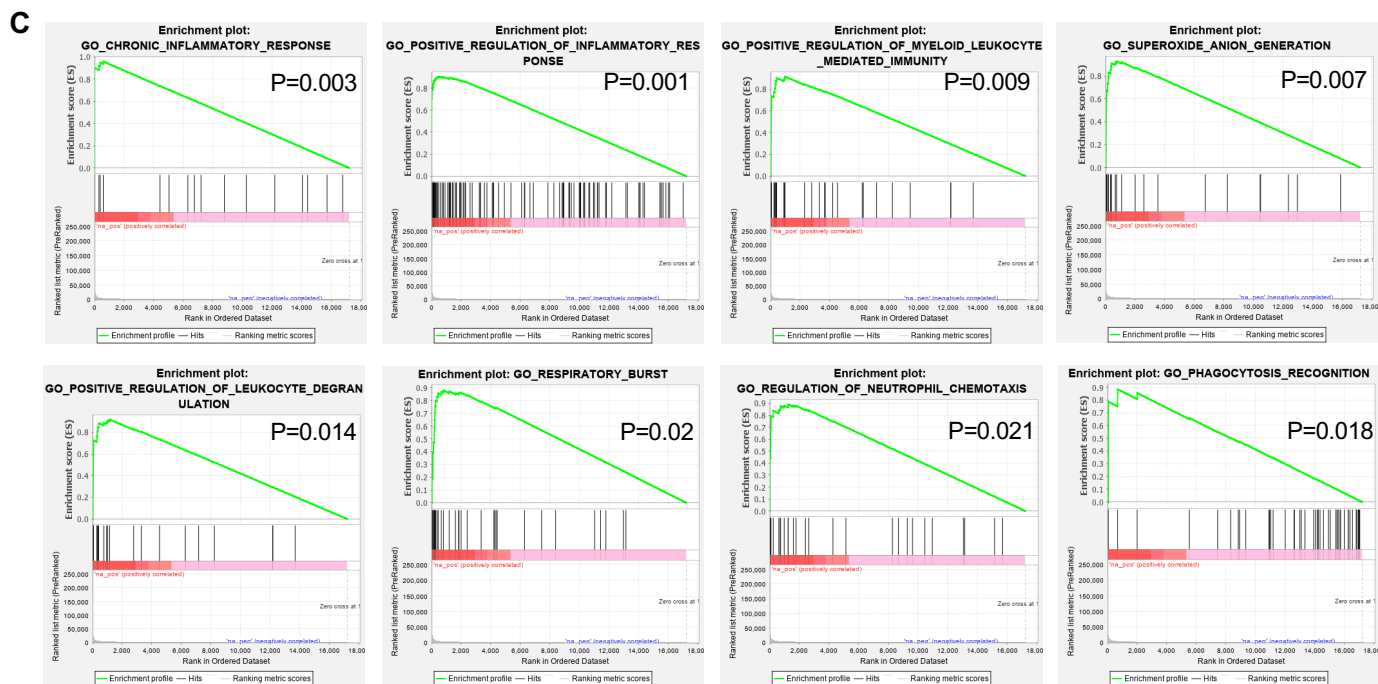

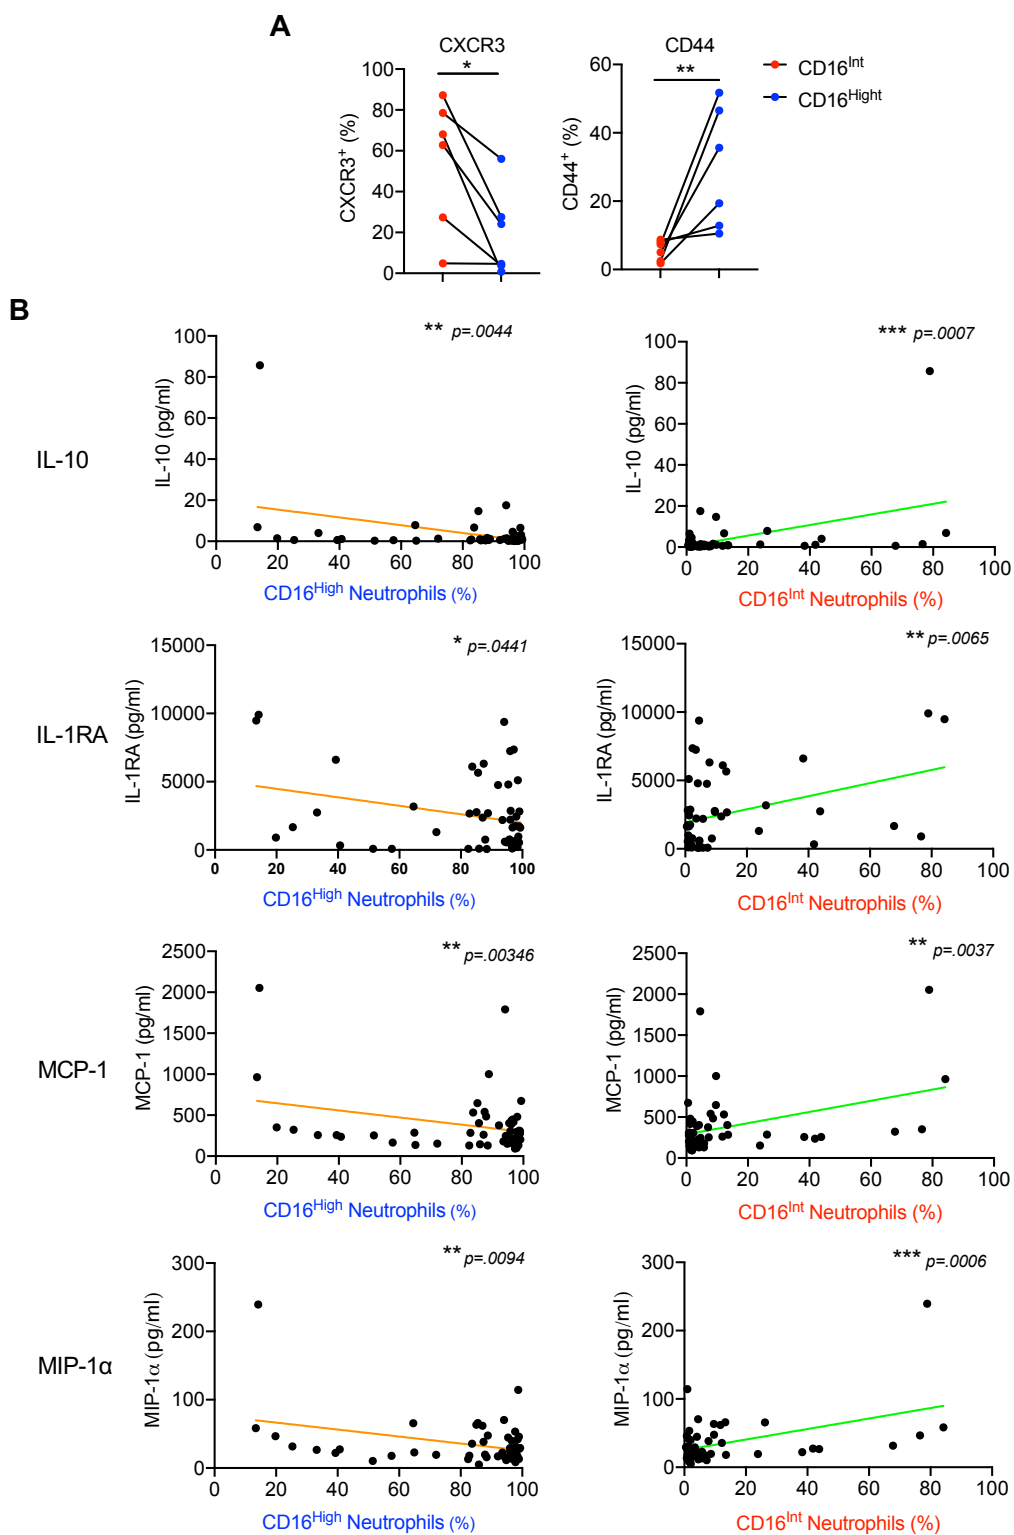

Morrissey et al, Supplemental Figure 6

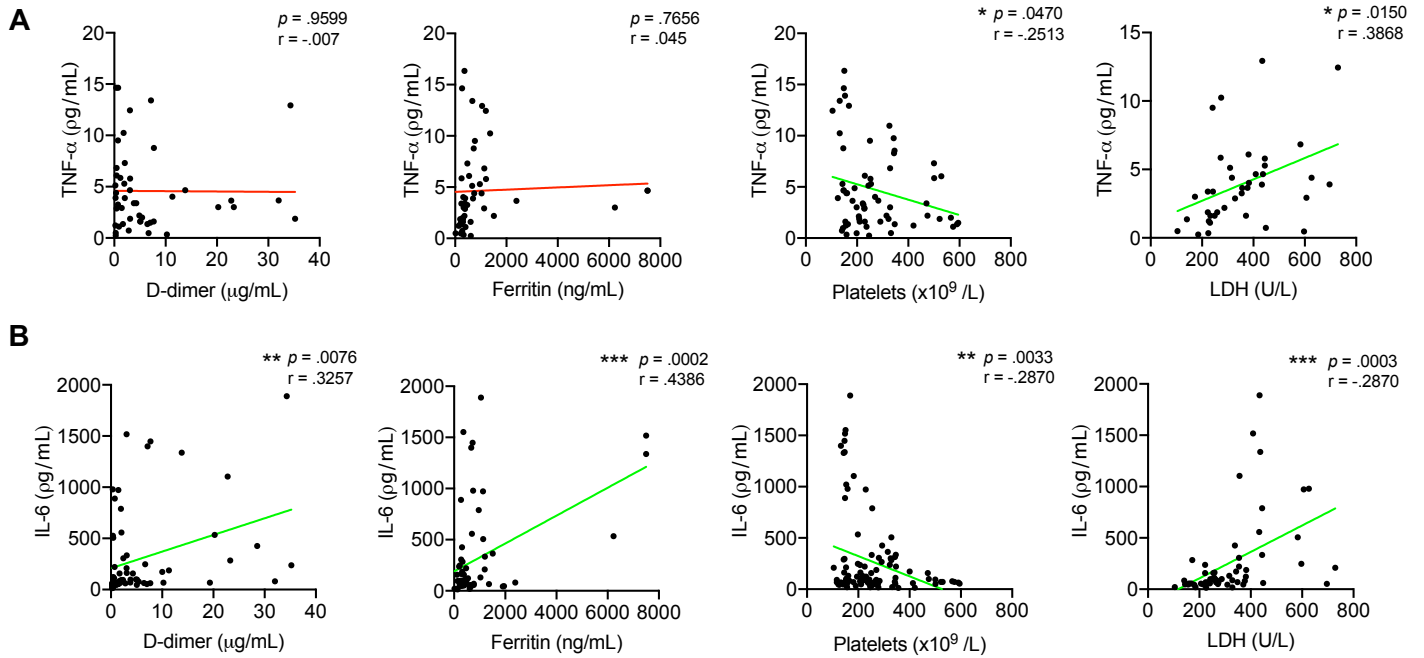

Morrissey et al, Supplemental Figure 7

**A** Severe

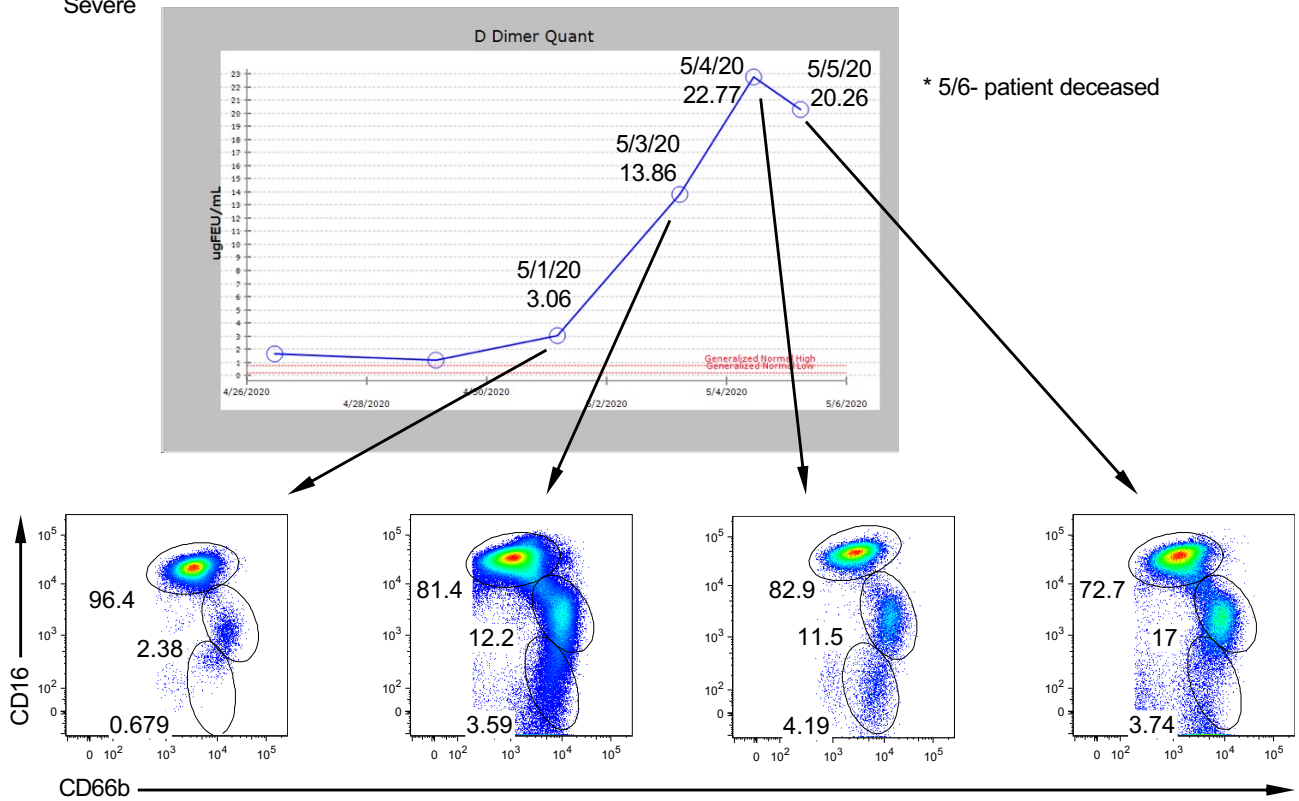

**B**

Moderate

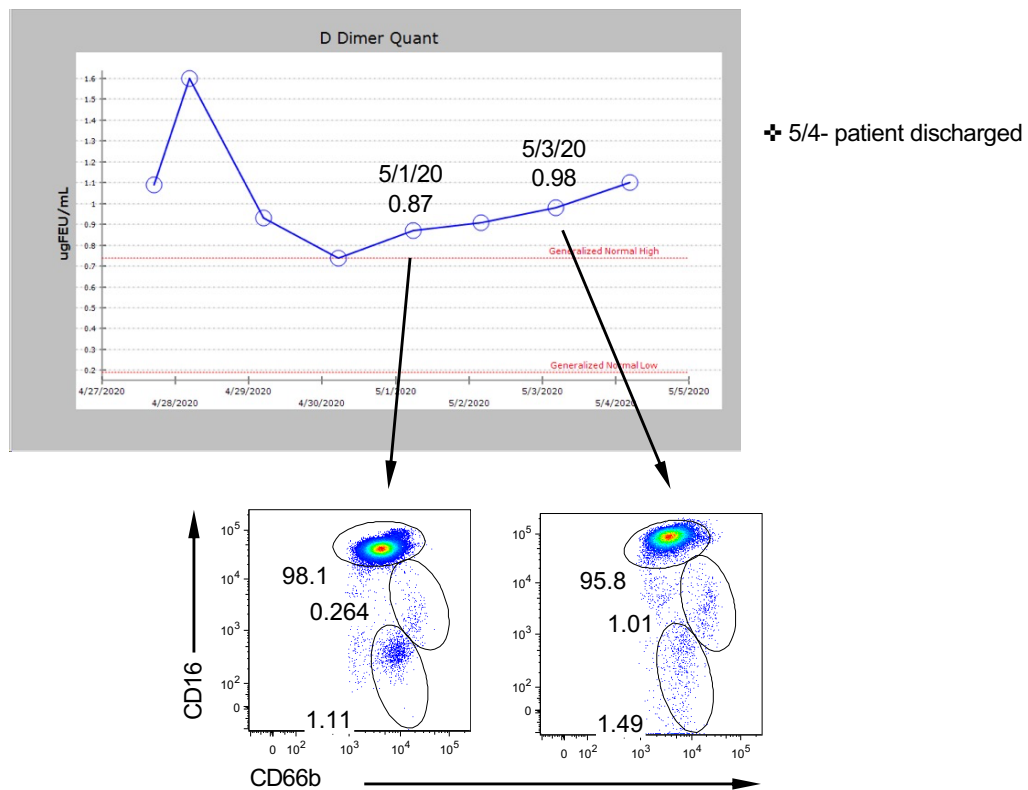

Supplement: jciinsight-6-148435-s085.pdf [file jciinsight-6-148435-s085.pdf]
